# Supplementary material for: MoS2 quantum dots as a unique fluorescent “turn-off–on” probe for the simple and rapid determination of adenosine triphosphate
Source: Royal Society of Chemistry journal article supplement (doi:10.1039/c9tb00191c), 2019-01-01
Supplement: c9tb00191c1.pdf [file c9tb00191c1.pdf]

## **Electronic Supplementary Materials**

# **MoS<sub>2</sub> quantum dots as a unique fluorescent “turn-off-on” probe for simple and rapid determination of adenosine triphosphate**

Yaping Zhong, TaoYi\*

Department of Chemistry and Collaborative Innovation Center of Chemistry for  
Energy Materials, Fudan University, Shanghai 200438, China

\* Corresponding authors

E-mail addresses: yitao@fudan.edu.cn (T. Yi)

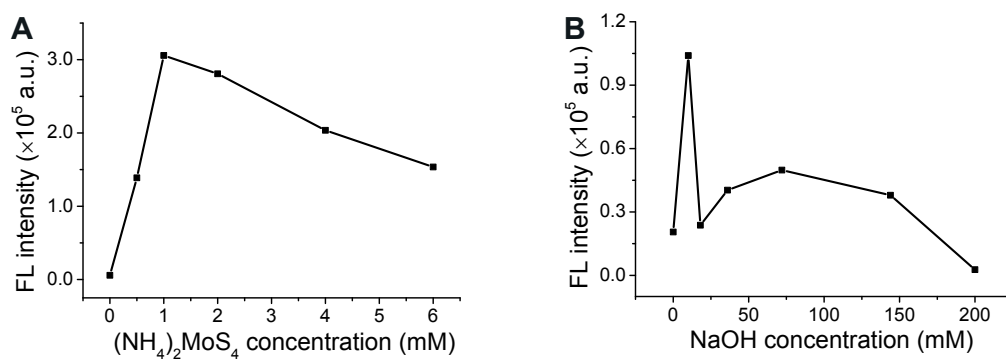

**Figure S1.** The fluorescence intensity of prepared  $\text{MoS}_2$  QDs at 506 nm with excitation at 400 nm under different (A)  $(\text{NH}_4)_2\text{MoS}_4$  concentration (0-6 mM) and (B) NaOH concentration (0-200 mM).

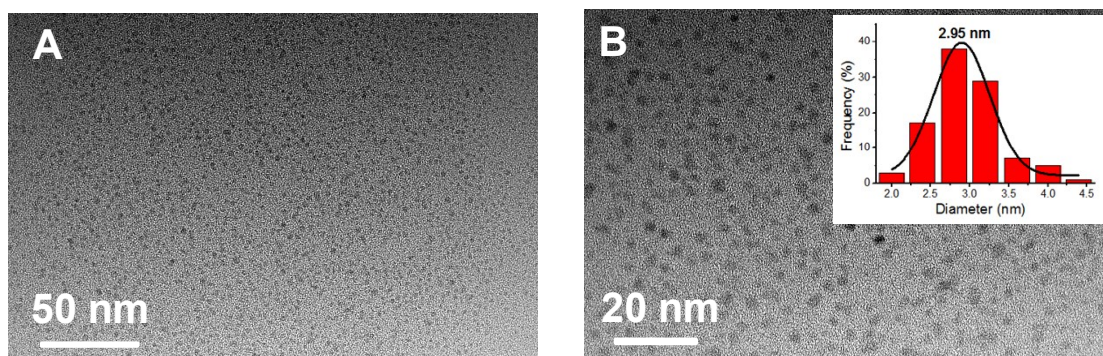

**Figure S2.** HRTEM images of  $\text{MoS}_2$  QDs at a scale bar of (A) 50 nm and (B) 20 nm. Inset of B shows the particle size distributions of  $\text{MoS}_2$  QDs.

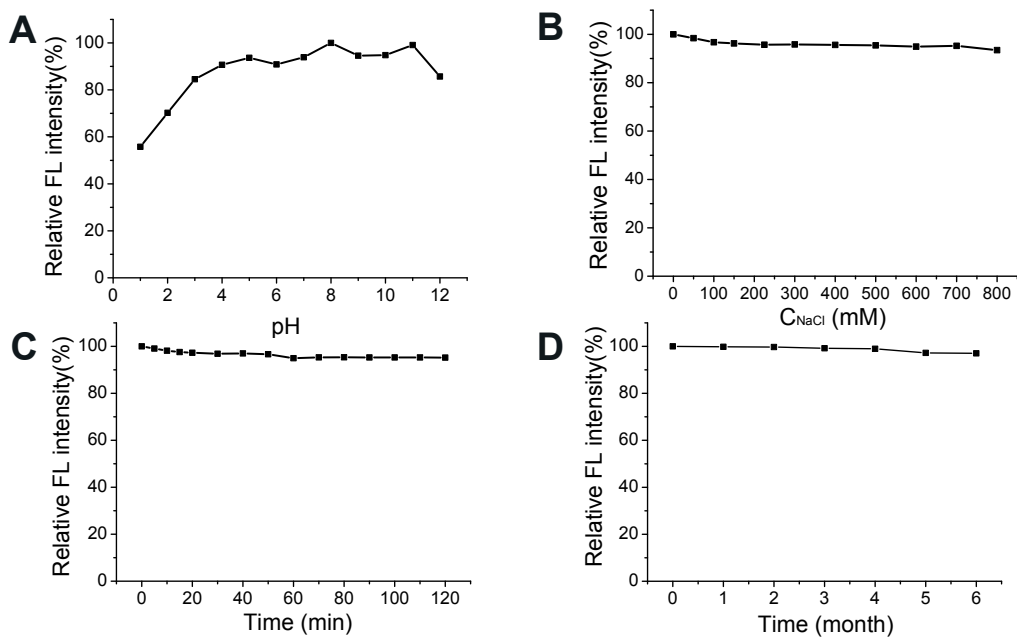

**Figure S3.** The stability of MoS<sub>2</sub> QDs under (A) different pH range (1-12), (B) different NaCl concentration (0-800 μM), (C) continuous UV light illumination (0-2 h), and (D) different storage time (0-6 month).

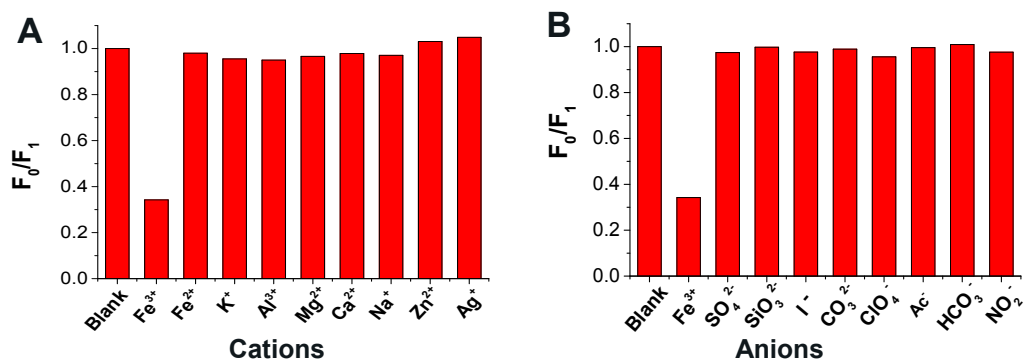

**Figure S4.** The quenching effect of different (A) cations and (B) anions toward MoS<sub>2</sub> QDs. The concentrations of Fe<sup>3+</sup> was 0.35 mM and other cations and anions were all 0.5 mM. The fluorescence intensities of MoS<sub>2</sub> QDs in the absence or presence of different interfering substances are denoted by F<sub>1</sub> and F<sub>0</sub>.

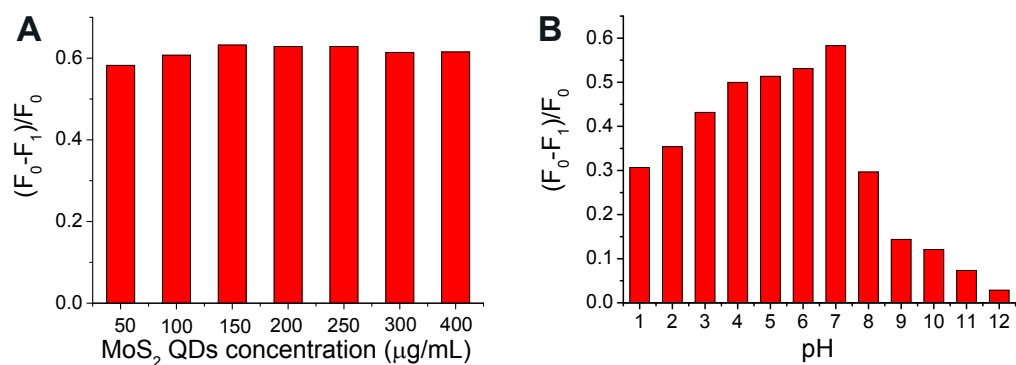

**Figure S5.** The effect of (A) MoS<sub>2</sub> QDs concentration and (B) pH on the fluorescence quenching of MoS<sub>2</sub> QDs in the presence of 0.35 mM Fe<sup>3+</sup>. The fluorescence intensities of MoS<sub>2</sub> QDs in the absence or presence of Fe<sup>3+</sup> are denoted by F<sub>1</sub> and F<sub>0</sub>.

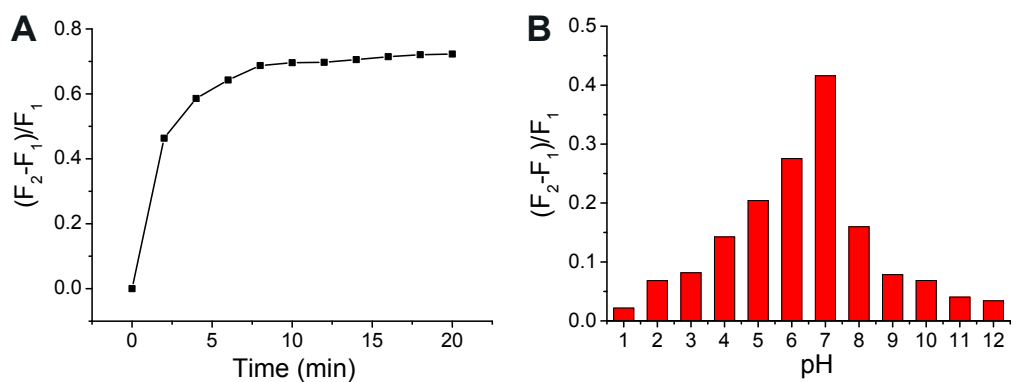

**Figure S6.** The influence of (A) reaction time and (B) reaction pH on the fluorescence restoration of MoS<sub>2</sub> QDs/Fe<sup>3+</sup> system by the addition of ATP. The fluorescence intensities of MoS<sub>2</sub> QDs/Fe<sup>3+</sup> in the absence or presence of (A) 90 µM ATP, and (B) 30 µM ATP are denoted by F<sub>2</sub> and F<sub>1</sub>.

**Table S1.** Comparison of performance of the new method with other reported fluorescent methods for detection of ATP.

| Method | Probe                | Detection limit ( $\mu\text{M}$ )   | Linear range             | Detection condition                       | Ref.      |
|--------|----------------------|-------------------------------------|--------------------------|-------------------------------------------|-----------|
| FL     | GO/MB                | 0.5                                 | 10 $\mu\text{M}$ to 3 mM | RT for 30 min                             | 21        |
| FL     | CdTe QDs             | 2.07                                | 5-50 $\mu\text{M}$       | RT for 20 min                             | 22        |
| FL     | NR                   | 0.1                                 | 0.1-10 $\mu\text{M}$     | /                                         | 23        |
| FL     | SNC                  | 0.033                               | 0.1-10 $\mu\text{M}$     | RT for 30 min                             | 24        |
| FL     | G-Q                  | 0.14                                | 0.5-50 $\mu\text{M}$     | (1) 20°C for 70 min<br>(2) 40°C for 5 min | 25        |
| FL     | Ag@SiO <sub>2</sub>  | 8                                   | 0-500 $\mu\text{M}$      | 45°C for 30 min                           | 26        |
| FL     | SNC                  | 0.0916                              | 1.0-7.0 $\mu\text{M}$    | (1) RT for 2 h<br>(2) 4°C for 30 min      | 27        |
| FL     | GNC                  | 28                                  | 50-100 $\mu\text{M}$     | RT for 15 min                             | 28        |
| FL     | MoS <sub>2</sub> QDs | 5 (lowest detectable concentration) | 0-140 $\mu\text{M}$      | RT for 10 min                             | This work |

\*Abbreviation: Graphene Oxide (GO), Naphthalimide-rhodamine compound (NR), Silver nanoclusters (SNC), G-quadruplex (G-Q), gold nanoclusters (GNC), carbon nanoparticles (CNP)

**Table S2.** The maximum fluorescence excitation and emission wavelength as well as sensing models of other reported MoS<sub>2</sub> QDs.

| Sensing model    | Excitation      | Emission        | Ref. |
|------------------|-----------------|-----------------|------|
|                  | wavelength (nm) | wavelength (nm) |      |
| Turn-on          | 400             | 480             | 1    |
| Turn-off/Turn-on | 360             | 428             | 2    |
| Turn-off-on      | 315             | 412             | 3    |
| Turn-off-on      | 360             | 440             | 4    |
| Turn-off         | 375             | 450             | 5    |
| Turn-off         | 267             | 380             | 6    |
| Turn-off         | 315             | 412             | 7    |
| /                | 370             | 461             | 8    |
| Turn-on          | 330             | 410             | 9    |
| Turn-off         | 340             | 425             | 10   |
| Turn-off         | 340             | 423             | 11   |
| Turn-off         | 308             | 402             | 12   |
| Turn-off-on      | 330             | 400             | 13   |
| Turn-off         | 360             | 454             | 14   |
| /                | 460             | 530             | 15   |
| /                | 560             | 594             | 16   |
| /                | 440             | 510             | 17   |
| Turn-on          | 310             | 418             | 18   |
| /                | 340             | 410             | 19   |

|             |     |     |           |
|-------------|-----|-----|-----------|
| Turn-on     | 300 | 410 | 20        |
| Turn-off-on | 400 | 506 | This work |

**Table S3.** Effect of co-existing substances on the FL intensity of MoS<sub>2</sub> QDs/Fe<sup>3+</sup> with 100 μM ATP.

| Coexisting substances          | Concentration (μM) | Change of the fluorescence intensity (%) | Coexisting substances | Concentration (μM) | Change of the fluorescence intensity (%) |
|--------------------------------|--------------------|------------------------------------------|-----------------------|--------------------|------------------------------------------|
| K <sup>+</sup>                 | 500                | 3.9                                      | Asparagine            | 100                | 2.5                                      |
| Na <sup>+</sup>                | 500                | 1.9                                      | Glutamine             | 100                | 2.4                                      |
| Zn <sup>2+</sup>               | 500                | 4.0                                      | Isoleucine            | 100                | 1.8                                      |
| Ca <sup>2+</sup>               | 500                | 2.8                                      | Alanine               | 100                | 1.5                                      |
| Al <sup>3+</sup>               | 500                | 1.9                                      | Proline               | 100                | 1.0                                      |
| Ag <sup>+</sup>                | 500                | 3.8                                      | Serine                | 100                | 3.1                                      |
| Mg <sup>2+</sup>               | 500                | 4.6                                      | Aspartic acid         | 100                | 2.5                                      |
| SO <sub>4</sub> <sup>2-</sup>  | 500                | 3.5                                      | Leucine               | 100                | 2.3                                      |
| SiO <sub>3</sub> <sup>2-</sup> | 500                | 3.7                                      | Tyrosine              | 100                | 1.0                                      |
| CO <sub>3</sub> <sup>2-</sup>  | 500                | 4.0                                      | Methionine            | 100                | 1.3                                      |
| ClO <sub>4</sub> <sup>-</sup>  | 500                | 4.8                                      | Histidine             | 100                | 0.9                                      |
| HCO <sub>3</sub> <sup>-</sup>  | 500                | 3.4                                      | Cystine               | 100                | 2.1                                      |
| NO <sub>2</sub> <sup>-</sup>   | 500                | 3.5                                      | Valine                | 100                | 1.8                                      |
| Ac <sup>-</sup>                | 500                | 4.5                                      | Tyrosine              | 100                | 2.4                                      |
| AA                             | 500                | 1.0                                      | Phenylalanine         | 100                | 1.5                                      |
| GSH                            | 500                | 3.5                                      | Lysine                | 100                | 3.7                                      |
| Glucose                        | 500                | 3.0                                      | Glutamic acid         | 100                | 1.8                                      |
| H <sub>2</sub> O <sub>2</sub>  | 500                | 2.5                                      | Threonine             | 100                | 2.0                                      |
| Arginine                       | 100                | 1.9                                      | Glycine               | 100                | 3.5                                      |

#### References

1. T. W. Lin, N. Dhenadhayalan, H. L. Lee, Y. T. Lin, K. C. Lin and A. Chang, *Sensor. Actuat. B-Chem.*, 2019, **281**, 659-669.
2. Q. Wu, X. Wang, Y. Jiang, W. Sun, C. Wang, M. Yang and C. Zhang, *ChemistrySelect*, 2018, **3**, 2326-2331.
3. J. Chen, Y. Li, Y. Huang, H. Zhang, X. Chen and H. Qiu, *Microchim. Acta*, 2019, **186**, 58-66.
4. L. Hu, Q. Zhang, X. Gan, W. Yin and W. Fu, *Anal. Bioanal. Chem.*, 2018, **410**, 7551-7557.
5. Z. Gan, Q. Gui, Y. Shan, P. Pan, N. Zhang and L. Zhang, *J. Appl. Phys.*, 2016, **120**, 104503.
6. X. Liu, W. Zhang, L. Huang, N. Hu, W. Liu, Y. Liu, S. Li, C. Yang, Y. Suo and J. Wang, *Microchim. Acta*, 2018, **185**, 234-241.
7. Y. Wang, P. Zhang, Q. Lu, Y. Wang, W. Fu, Q. Tan and W. Luo, *Microchim. Acta*, 2018, **185**, 233-238.

8. Q. Liu, C. Hu and X. Wang, *RSC Adv.*, 2016, **6**, 25605-25610.
9. S. Hariharan and B. Karthikeyan, *RSC Adv.*, 2016, **6**, 101770-101777.
10. X. Wang, Q. Wu, K. Jiang, C. Wang and C. Zhang, *Sensor. Actuat. B-Chem.*, 2017, **252**, 183-190.
11. D. Haldar, D. Dinda and S. K. Saha, *J. Mater. Chem. C*, 2016, **4**, 6321-6326.
12. Y. Wang and Y. Ni, *Anal. Chem.*, 2014, **86**, 7463-7470.
13. W. Gu, Y. Yan, C. Zhang, C. Ding and Y. Xian, *ACS Appl. Mater. Inter.*, 2016, **8**, 11272-11279.
14. H. Huang, C. Du, H. Shi, X. Feng, J. Li, Y. Tan and W. Song, *Part. Part. Syst. Char.*, 2015, **32**, 72-79.
15. H. Dong, S. Tang, Y. Hao, H. Yu, W. Dai, G. Zhao, Y. Cao, H. Lu, X. Zhang and H. Ju, *ACS Appl. Mater. Inter.*, 2016, **8**, 3107-3114.
16. H. Lin, C. Wang, J. Wu, Z. Xu, Y. Huang and C. Zhang, *New. J. Chem.*, 2015, **39**, 8492-8497.
17. J. Y. Wu, X. Y. Zhang, X. D. Ma, Y. P. Qiu and T. Zhang, *RSC Adv.*, 2015, **5**, 95178-95182.
18. S. Zhang, X. Jia and E. Wang, *Nanoscale*, 2016, **8**, 15152-15157.
19. W. Gu, Y. Yan, X. Cao, C. Zhang, C. Ding and Y. Xian, *J. Mater. Chem. B*, 2016, **4**, 27-31.
20. W. Dai, H. Dong, B. Fugetsu, Y. Cao, H. Lu, X. Ma and X. Zhang, *Small*, 2015, **11**, 4158-4164.
21. M. Yi, S. Yang, Z. Peng, C. Liu, J. Li, W. Zhong, R. Yang and W. Tan, *Anal. Chem.*, 2014, **86**, 3548-3554.
22. F. Shi, Y. Li, Z. Lin, D. Ma and X. Su, *Sensor. Actuat. B-Chem.*, 2015, **220**, 433-440.
23. J. L. Tang, C. Y. Li, Y. F. Li and C. X. Zou, *Chem. Commun.*, 2014, **50**, 15411-15414.
24. J. D. Lee, J. Cang, Y. C. Chen, W. Y. Chen, C. M. Ou and H. T. Chang, *Biosens. Bioelectron.*, 2014, **58**, 266-271.
25. Y. Wei, Y. Chen, H. Li, S. Shuang, C. Dong and G. Wang, *Biosens. Bioelectron.*, 2015, **63**, 311-316.
26. L. Lu, Y. Qian, L. Wang, K. Ma and Y. Zhang, *ACS Appl. Mater. Inter.*, 2014, **6**, 1944-1950.
27. Y. Zhu, X. C. Hu, S. Shi, R.R. Gao, H.I. Huang, Y. Y. Zhu, X. Y. Lv and T.M. Yao, *Biosens. Bioelectron.*, 2016, **79**, 205-212.
28. P. H. Li, J. Y. Lin, C. T. Chen, W. R. Ciou, P. H. Chan, L. Luo, H. Y. Hsu, E. W. G. Diau and Y. C. Chen, *Anal. Chem.*, 2012, **84**, 5484-5488.
